# Supplementary material for: β-Adrenoceptor Activation in Breast MCF-10A Cells Induces a Pattern of Catecholamine Production Similar to that of Tumorigenic MCF-7 Cells
Source: MDPI journal article supplement (doi:10.3390/ijms21217968), 2020-10-27
Supplement: s1 [file s1]

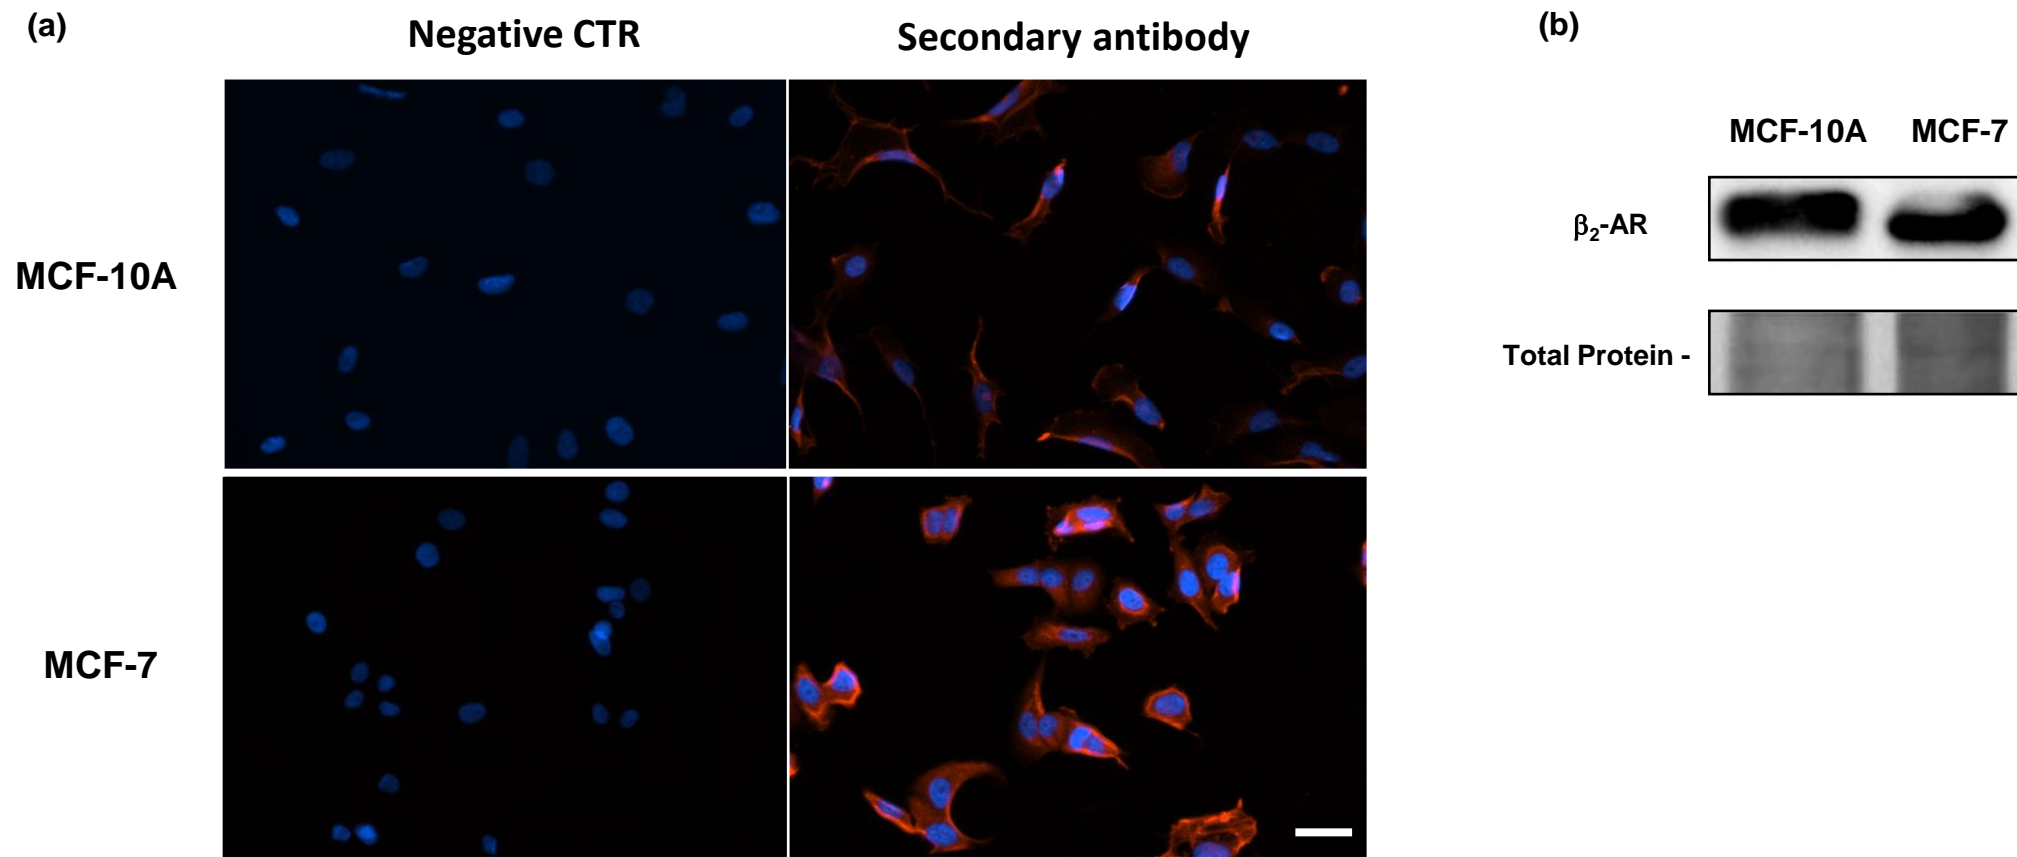

**Figure S3: Expression of  $\beta_2$ -adrenoceptors ( $\beta_2$ -AR) in MCF-10A or in MCF-7 cells.** (a) Representative microphotographs of MCF-10A and MCF-7 cells showing  $\beta_2$ -AR immunoreactivity, revealed by secondary antibody conjugated with Alexa fluor 594 (red fluorescence). Nuclei were labelled with Hoechst 33342 (blue fluorescence). Scale bar: 20  $\mu$ m. Negative control (CTR): without primary antibody. (b) Representative western blot of  $\beta_2$ -AR in MCF-10A and MCF-7 cells, obtained from whole cell lysates.

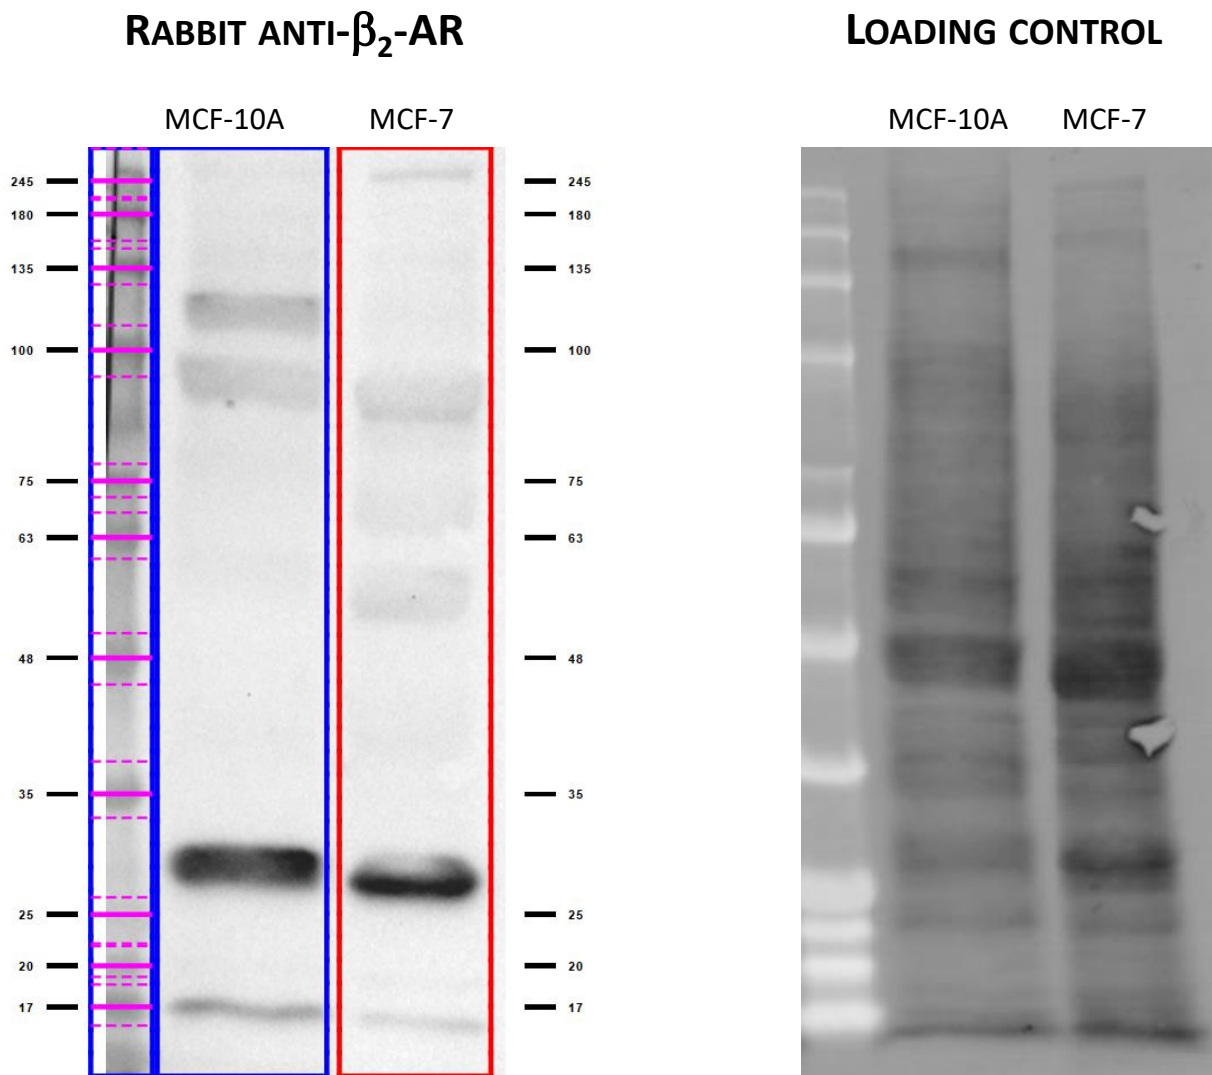

| Cell line             | $\beta_2$ -AR | Total protein   | $\beta_2$ -AR/total protein |
|-----------------------|---------------|-----------------|-----------------------------|
| Densitometry readings |               | Intensity ratio |                             |
| MCF-10A               | 20572525,49   | 111568991,73    | 18,4                        |
| MCF-7                 | 16884771,81   | 296390578,52    | 5,7                         |

Western blot of  $\beta_2$ -adrenoceptors ( $\beta_2$ -AR) in MCF-10A or in MCF-7 cells.  $\beta_2$ -AR expression was obtained from whole cell lysates.
