# Supplementary material for: β-Adrenoceptor Activation in Breast MCF-10A Cells Induces a Pattern of Catecholamine Production Similar to that of Tumorigenic MCF-7 Cells
Source: Int J Mol Sci. 2020 Oct 27;21(21):7968. doi: 10.3390/ijms21217968 (PMC7672553; doi:10.3390/ijms21217968)
Supplement: Supplementary file 1 [file ijms-21-07968-s001.zip]

Archive with 4 entries (4 files):
- Figure S1.JPG
- Figure S2.pdf
- Figure S3.pdf
- Table S1.JPG
